# Supplementary material
Source: publisher figshare collection journal article supplement (https://acs.figshare.com/ndownloader/files/29244134)
Supplement: Supplementary file 1 [file 29244134]

# Supporting Information

## Liquefied Natural Gas for Superconducting Energy Pipeline: Feasibility Study on Electrical Insulation

*Chuansheng Zhang<sup>1, 2</sup>, Chengyan Ren<sup>1, 2, \*</sup>, Shuai Zhang<sup>1</sup>, Hanwen Xue<sup>2, 3</sup>, Yanxing Zhao<sup>3</sup>, Zhihao Zhou<sup>2, 4</sup>, Jianhui Chen<sup>2, 4</sup>, Zhaozhi Luo<sup>2, 4</sup>, Wenju Sang<sup>2, 4</sup>, Liwei Jing<sup>4</sup>, Yuping Teng<sup>2, 4</sup>, Qingquan Qiu<sup>2, 4</sup>, Cheng Zhang<sup>1, 2</sup>, Maoqiong Gong<sup>2, 3</sup>, Guomin Zhang<sup>2, 4</sup>, Tao Shao<sup>1, 2, \*</sup> and Liye Xiao<sup>1, 2, 4</sup>*

1. Beijing International S&T Cooperation Base for Plasma Science and Energy Conversion, Institute of Electrical Engineering, Chinese Academy of Sciences, Haidian District, Beijing 100190, China;
2. University of Chinese Academy of Sciences, Haidian District, Beijing 100049, China;
3. Key Laboratory of Cryogenics, Technical Institute of Physics and Chemistry, Chinese Academy of Sciences, Haidian District, Beijing 100190, China;
4. Key Laboratory of Applied Superconductivity, Institute of Electrical Engineering, Chinese Academy of sciences, Haidian District, Beijing 100190, China

The experimental prototype is the 10 kV/1 kA superconducting energy pipeline with a length of 10 m<sup>1,2</sup>. The critical current of the prototype is 885 A at 100 K, and the transport rate of LNG is more than 15 L/min<sup>1</sup>. Unfortunately, it uses LN<sub>2</sub>/LCF<sub>4</sub> mixed liquid as main insulation medium, instead of LNG. Figure S1 is the scene of the LNG test. We are conducting final commissioning before LNG breakdown and flashover tests.

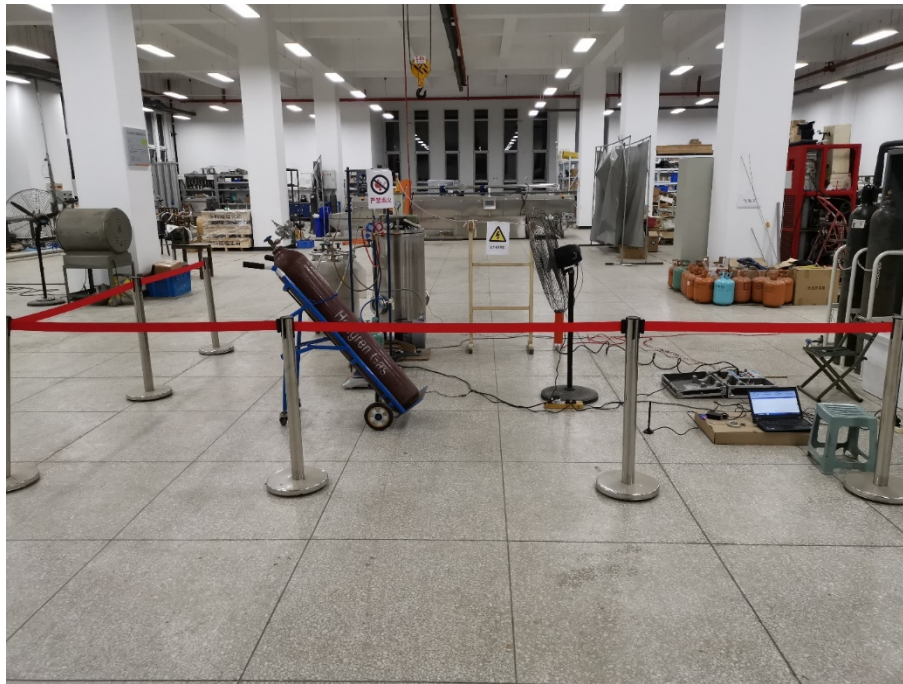

**Figure S1.** The scene of LNG breakdown and flashover test.

(1) Qiu, Q. Q.; Xiao, L. Y.; Zhang, G. M.; Teng, Y. P.; Song, N. H.; Gao, Z. Y.; Jing, L. W.; Zhao, Y. X.; Chen, J. H.; Zhang, J. L.; Zhou, Z.; Gong, M.; Qiu, M. Design and Testing of a 10 kV/1 kA Superconducting Energy Pipeline Prototype for Electric Power and Liquid Natural Gas Transportation. *Supercond. Sci. Technol.* **2020**, 33, No. 095007.

- (2) Chen, J. H.; Zhang, G. M.; Sang, W. J.; Wang, Y. H.; Zhang, C. S.; Zhao, Y. X.; Qiu, Q. Q.; Teng, Y. P.; Jing, L. W. Electrical Insulation Characteristics of LN<sub>2</sub>/CF<sub>4</sub> Mixture at Cryogenic Temperatures. *IEEE Trans. Appl. Supercond.* **2021**, *31*, 1–6.
